# Supplementary material
Source: PubMed Central journal article supplement (PMC3568441)

### Supplementary Figure 1.

Main Figure: Comparison of cumulative frequency distributions for alcohol intake estimates from past-week recall and usual quantity x frequency estimate. Data are from study participants for whom both estimates were available. The x-axis shows the reported alcohol intake and the y-axis shows the cumulative frequencies. Open symbols are for intake assessed from reported number of drinks in past week, filled symbols for intake assessed from reported usual quantity x frequency; red symbols and lines for women and blue for men.

Inset: Plot of alcohol intake reported for past week against intake from usual Quantity x Frequency, showing the line of equivalence and the observed regression.

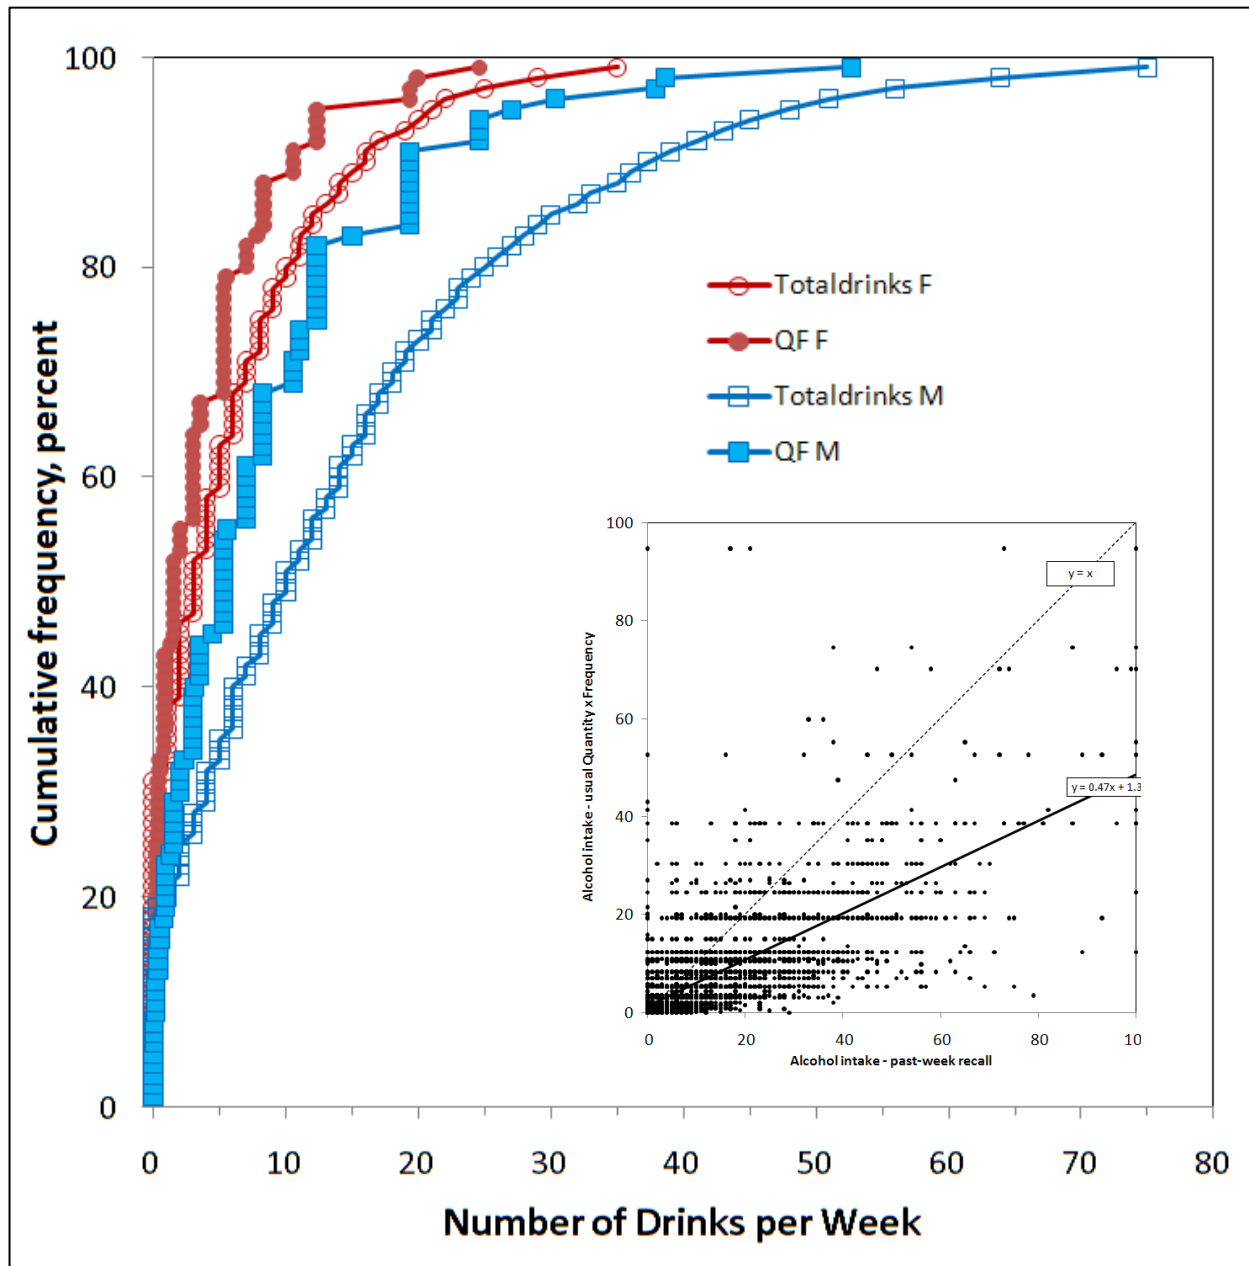

**Supplementary Figure 2.** Relationships between alcohol intake and body mass index in men and women. Error bars show SEM.

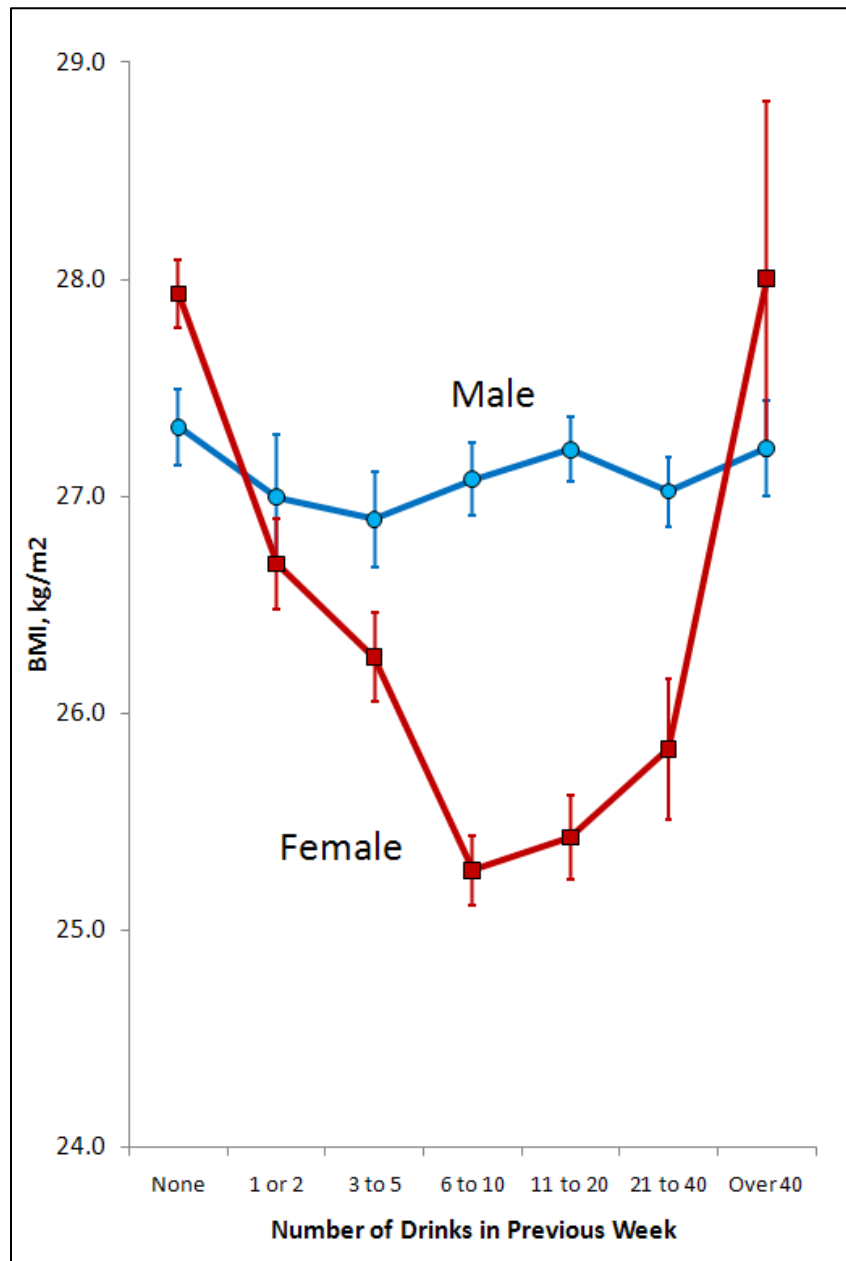

**Supplementary Figure 3.** Observed and predicted relationships between log (Drinks in past week + 1) and biomarker results (adjusted for sex, age, BMI and smoking). Dotted lines show predicted results from the quadratic regressions, points and continuous lines show means by intake groups.

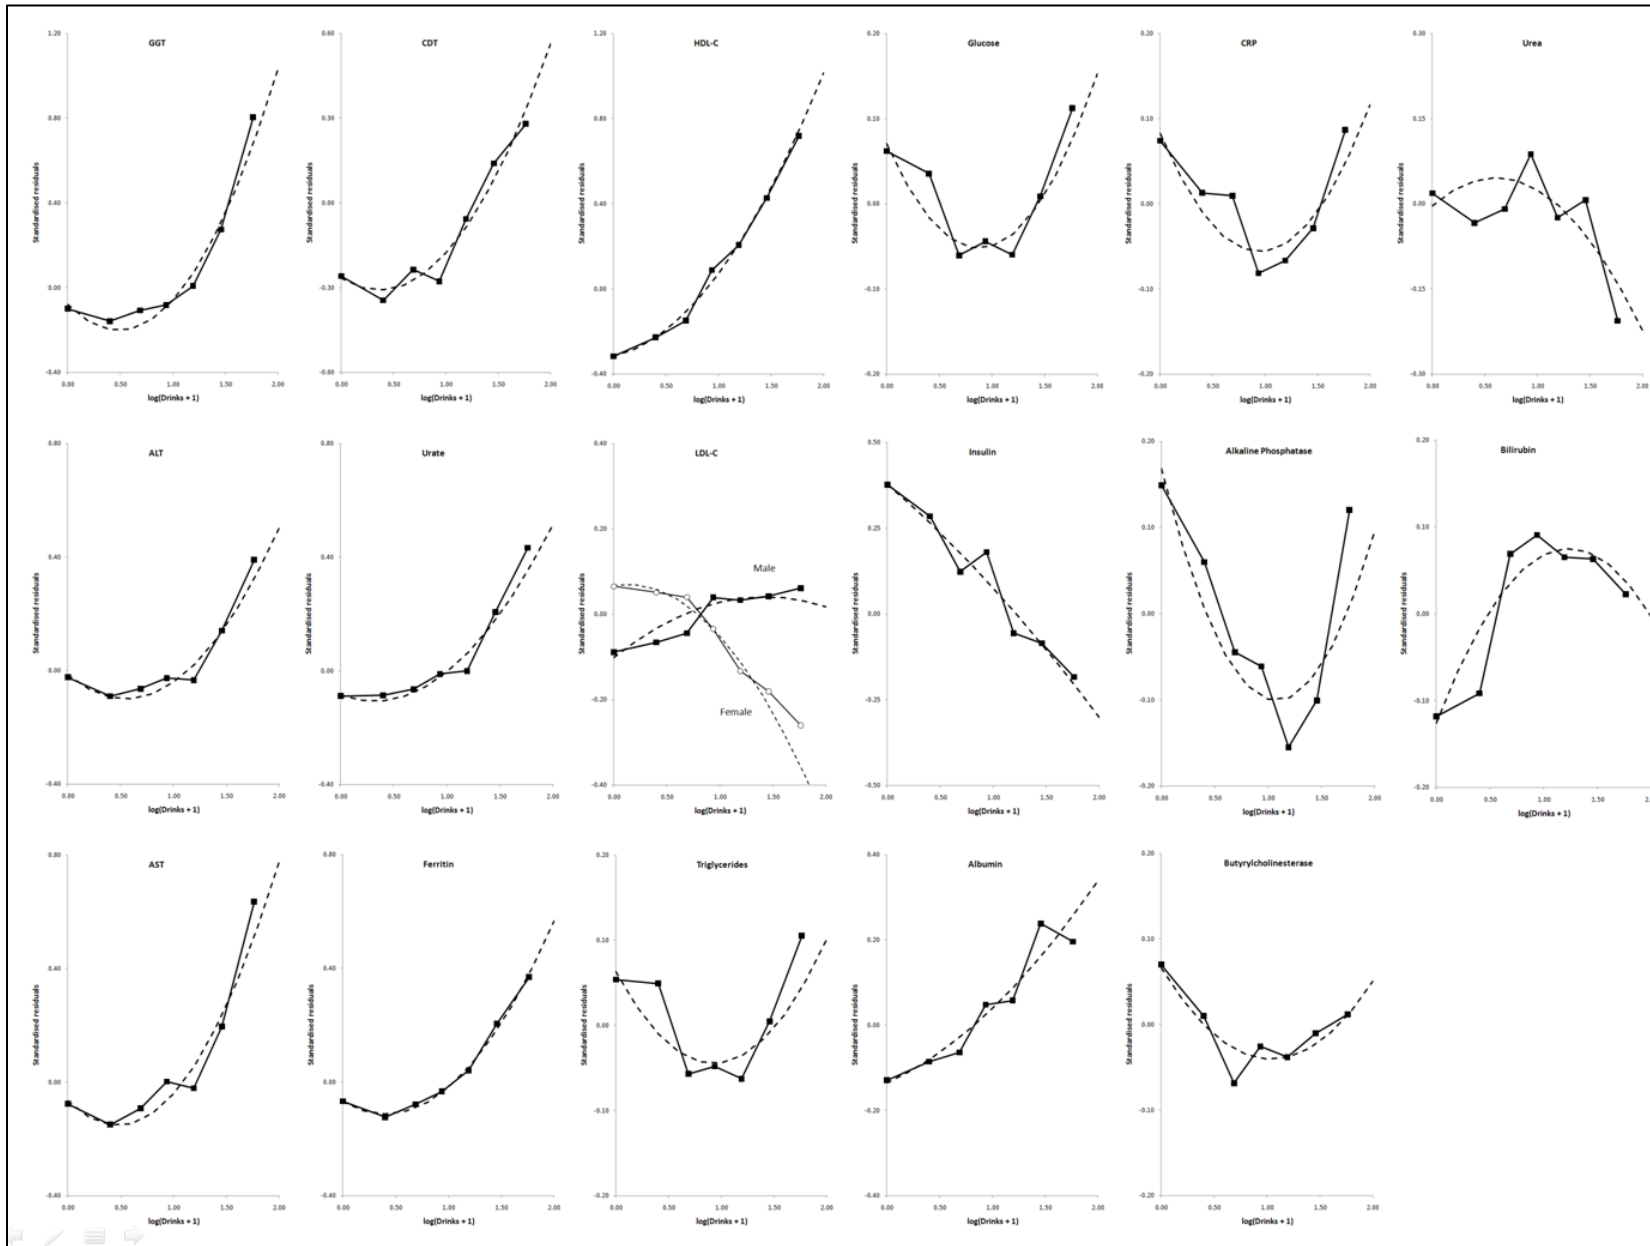

Supplementary Figure 4. Effects of usual alcohol intake (quantity-frequency measure) on biochemical markers.

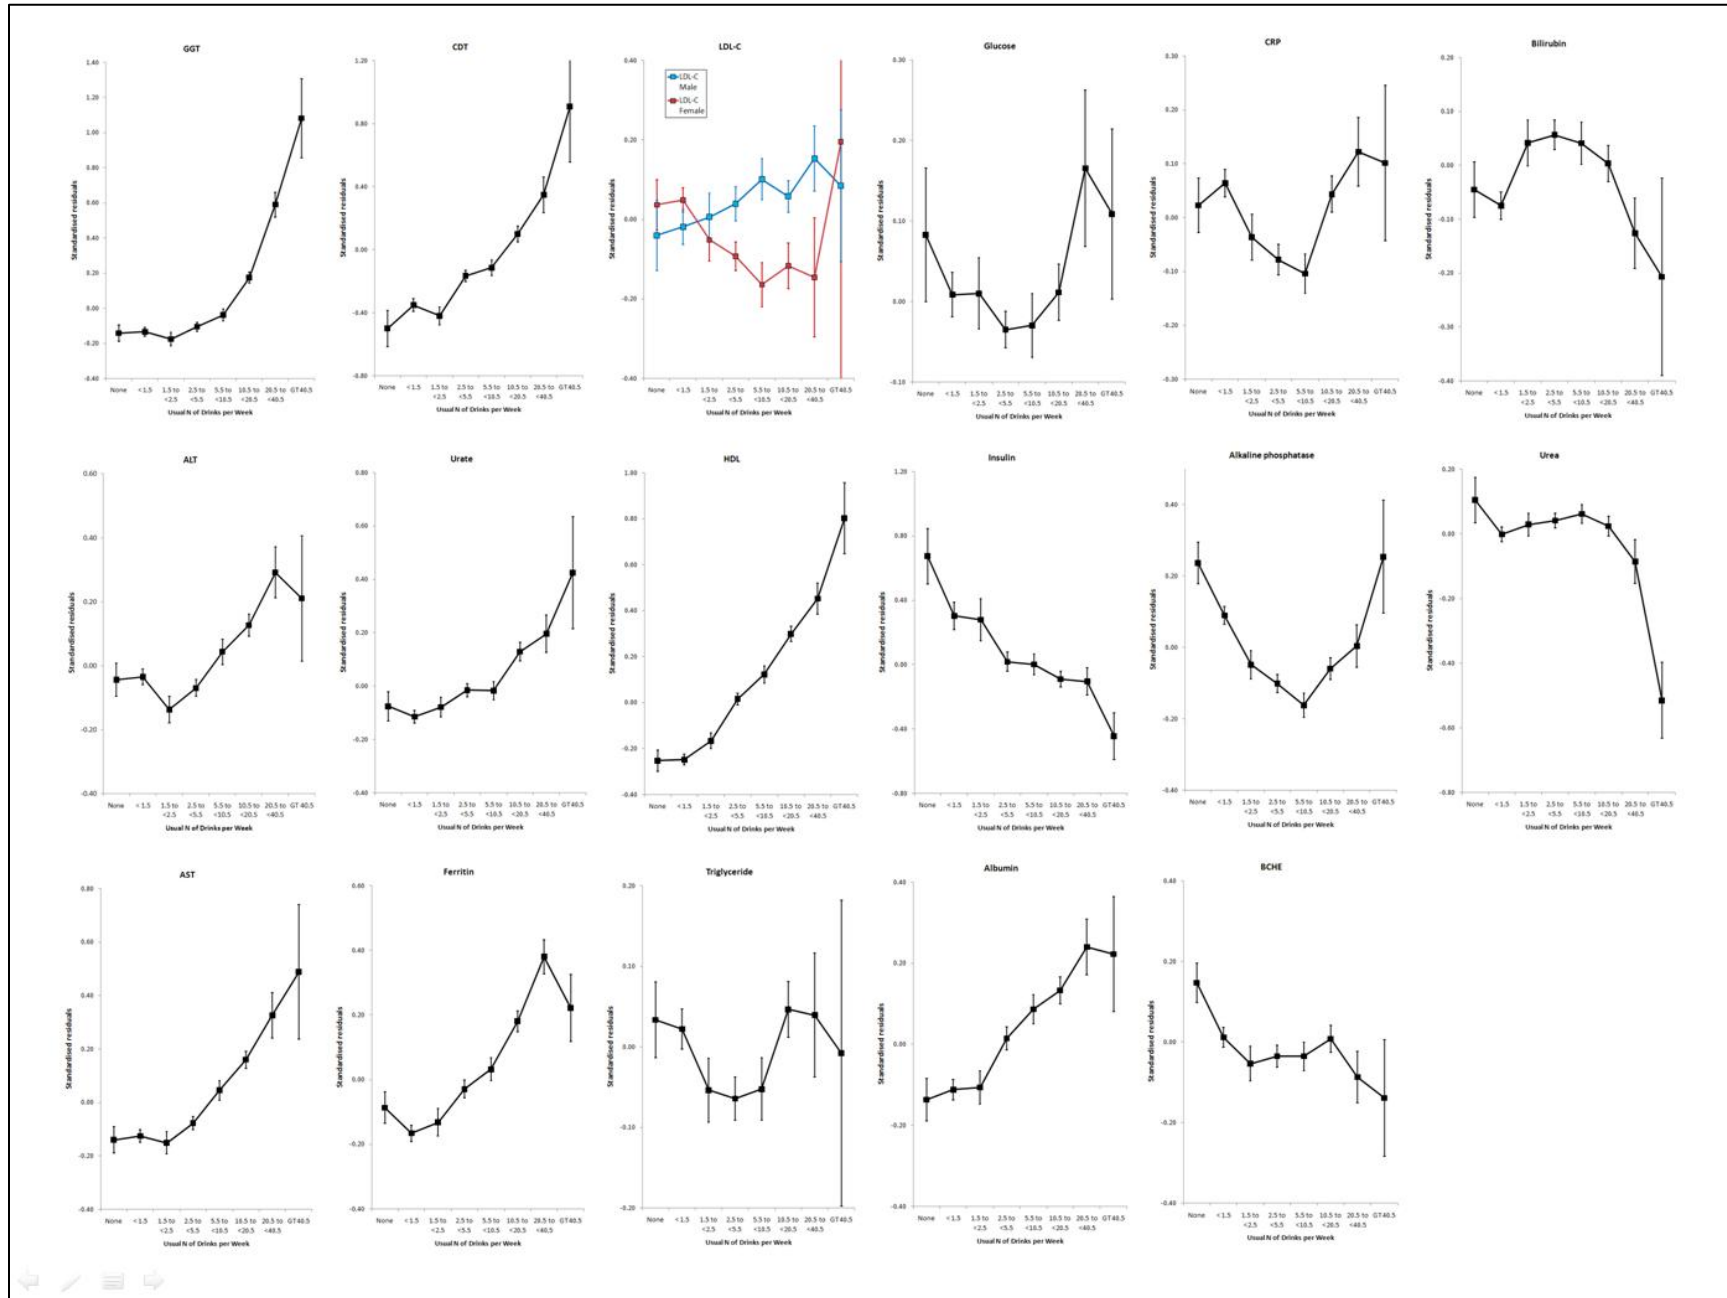

Supplementary Figure 5. Effects of sex on relationships between reported alcohol intake and biochemical markers.

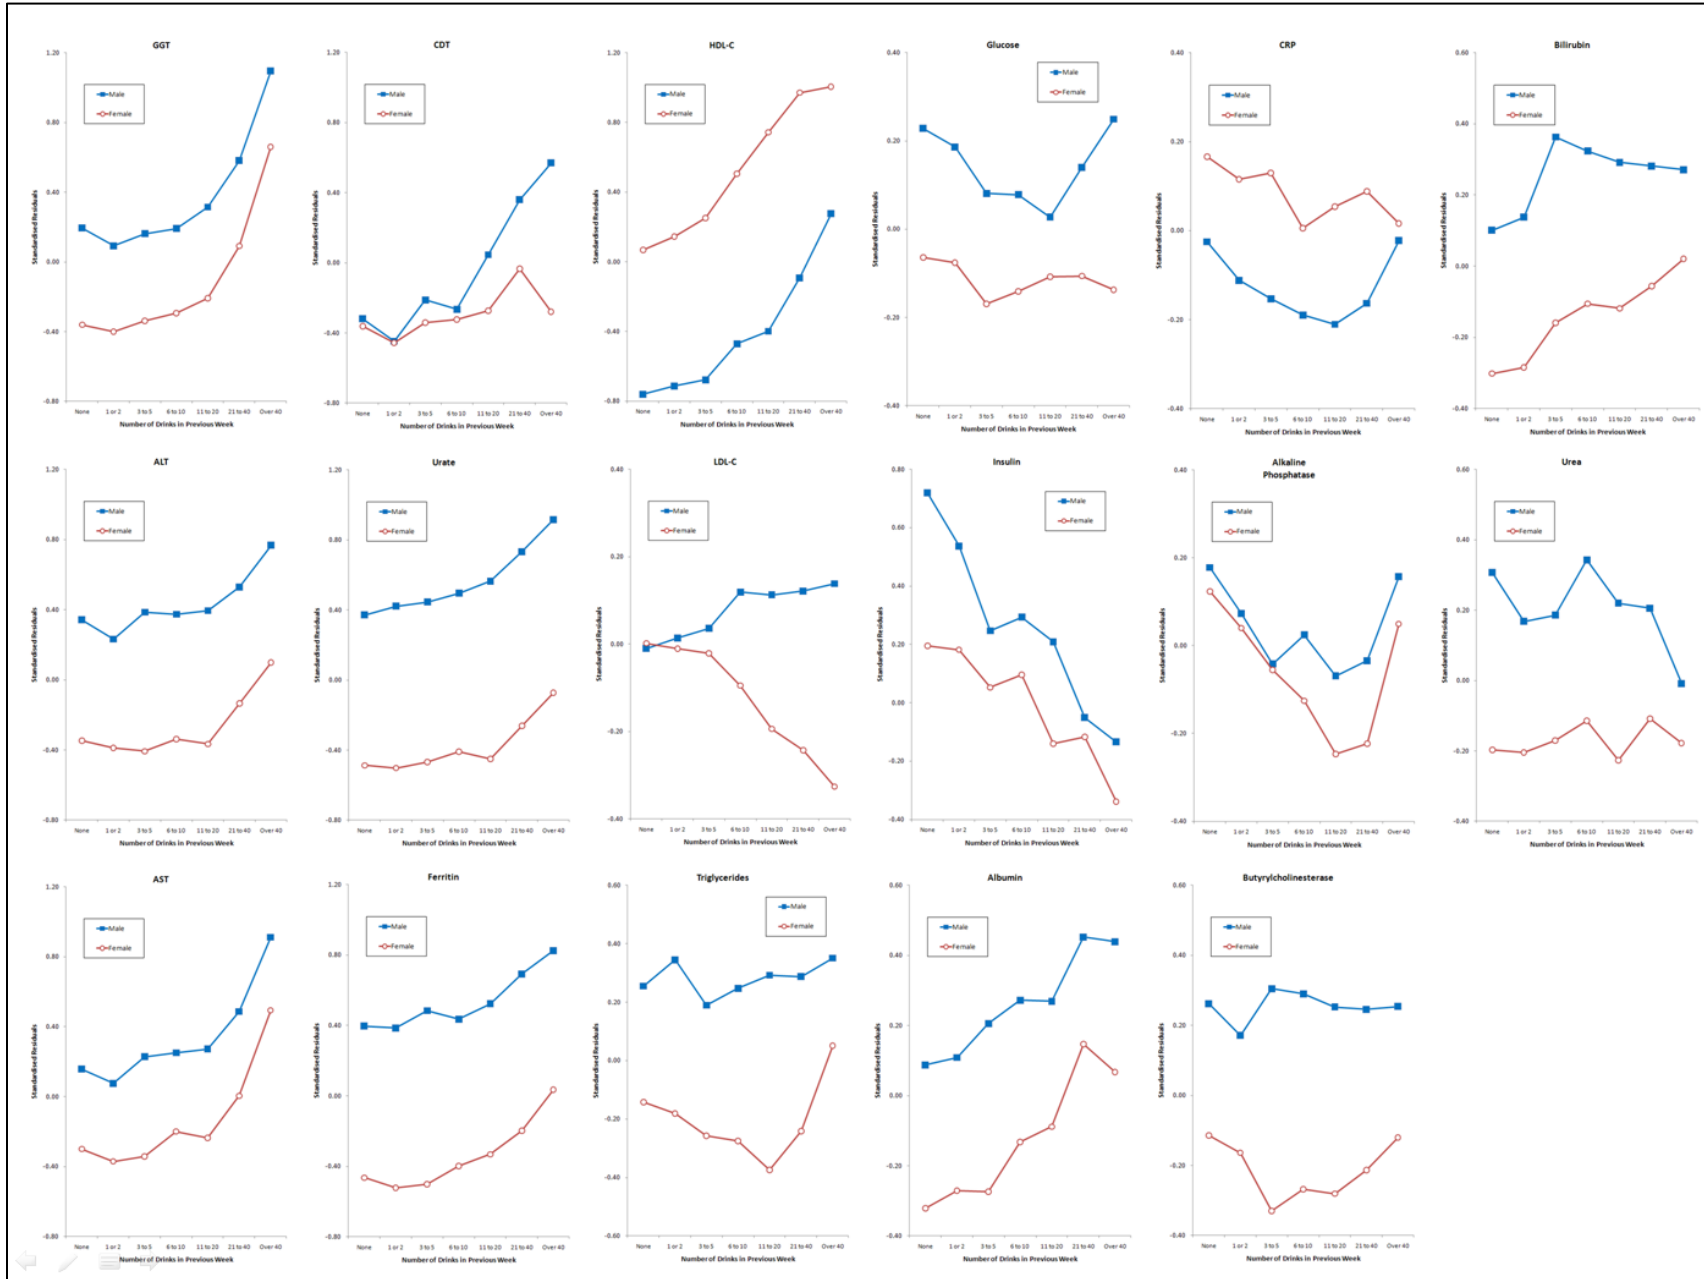

Supplementary Figure 6. Effects of lifetime alcohol dependence on relationships between reported alcohol intake and biochemical markers.

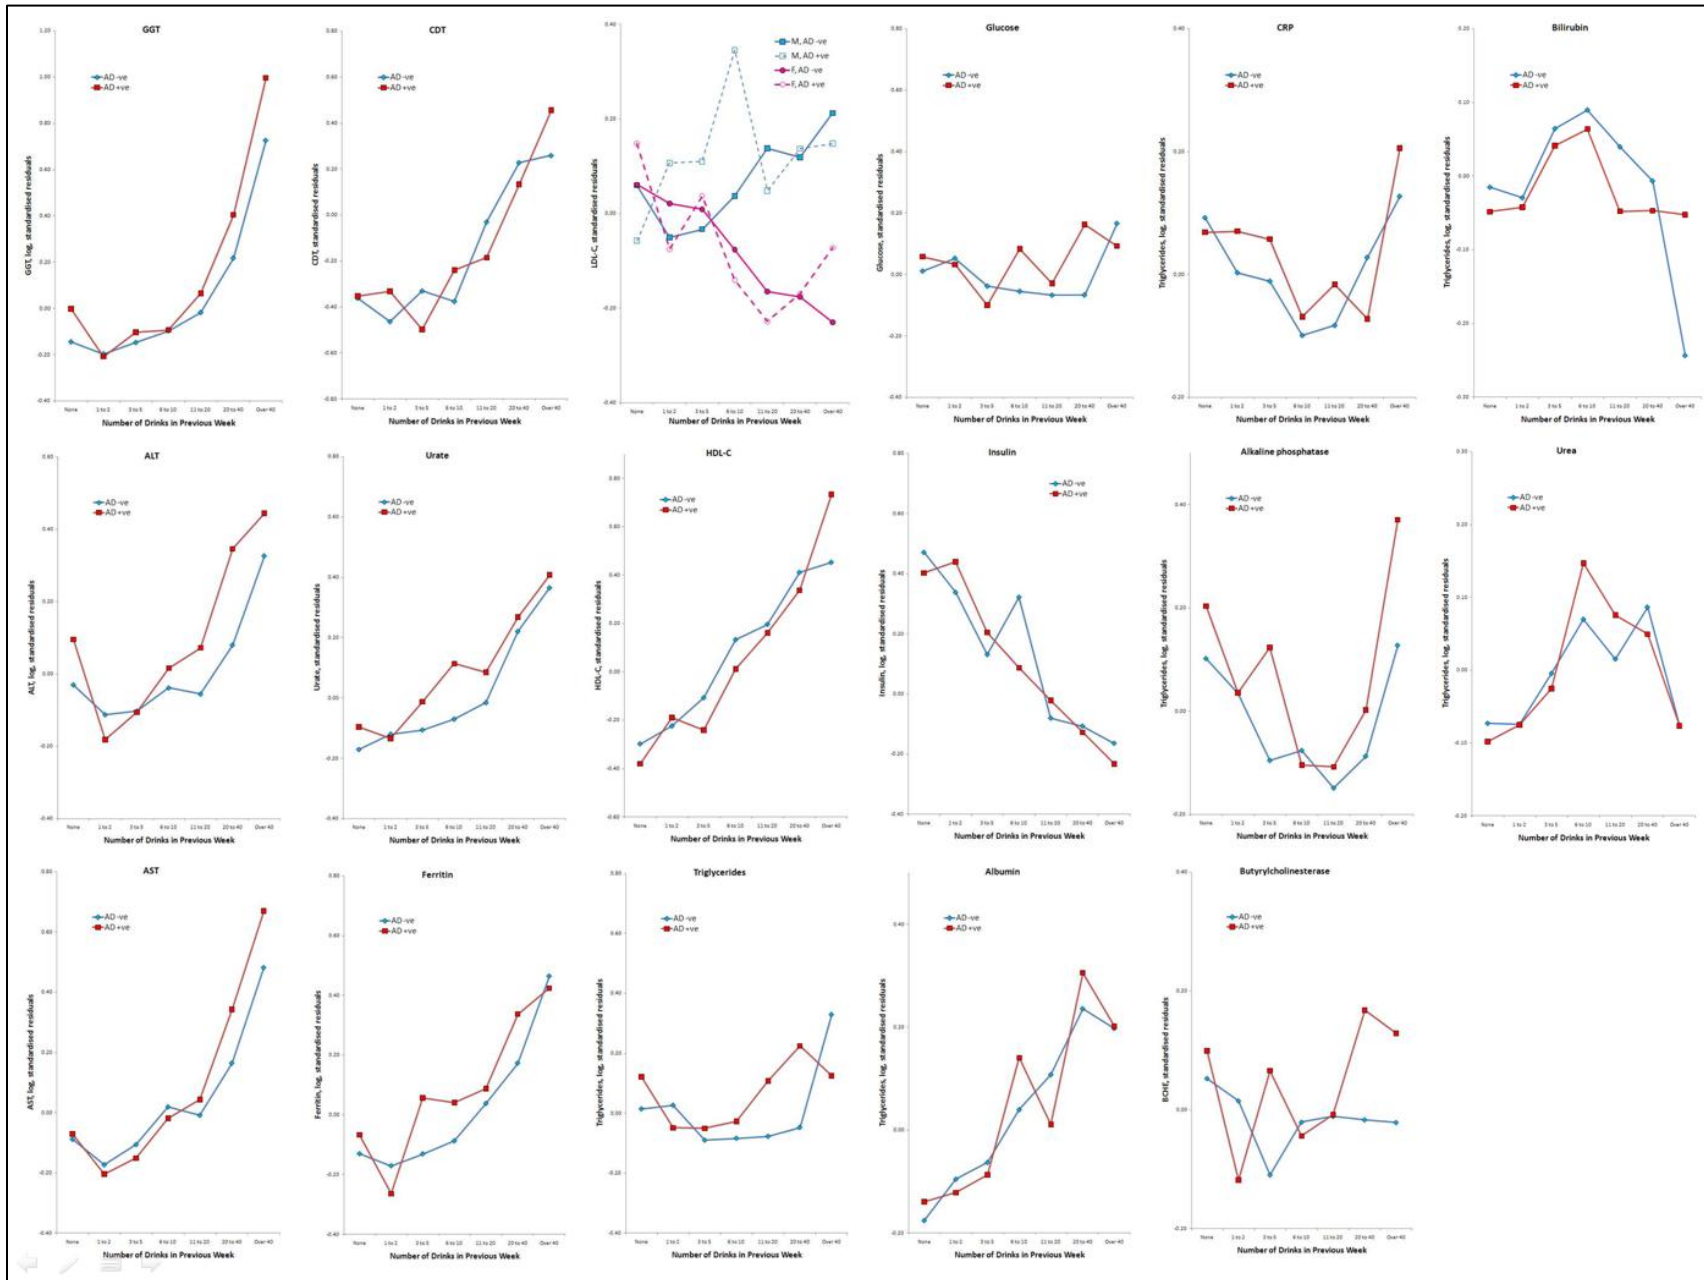

Supplementary Figure 7. Effects of current smoking status on relationships between reported alcohol intake and biochemical markers.

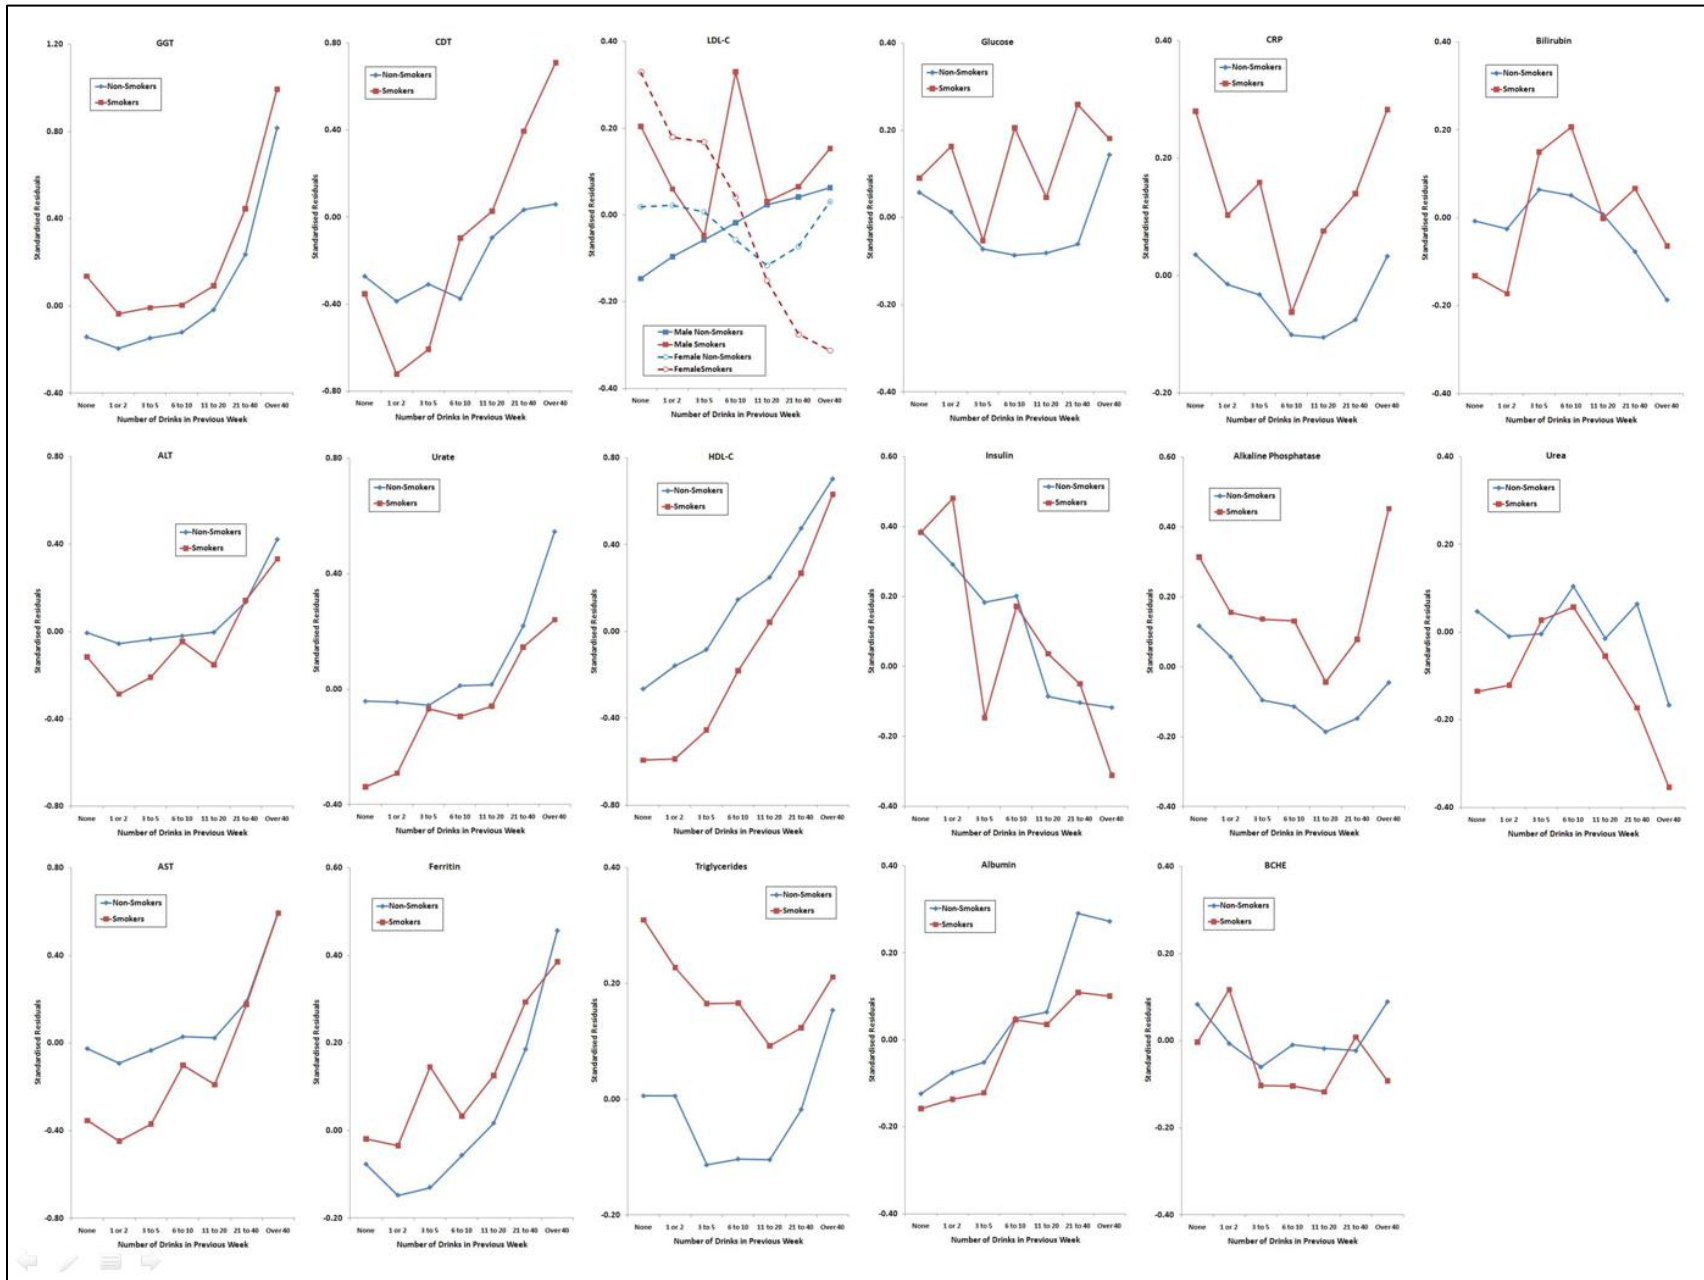

**Supplementary Figure 8.** Effects of BMI on biochemical markers (adjusted for sex, age, and reported alcohol intake).

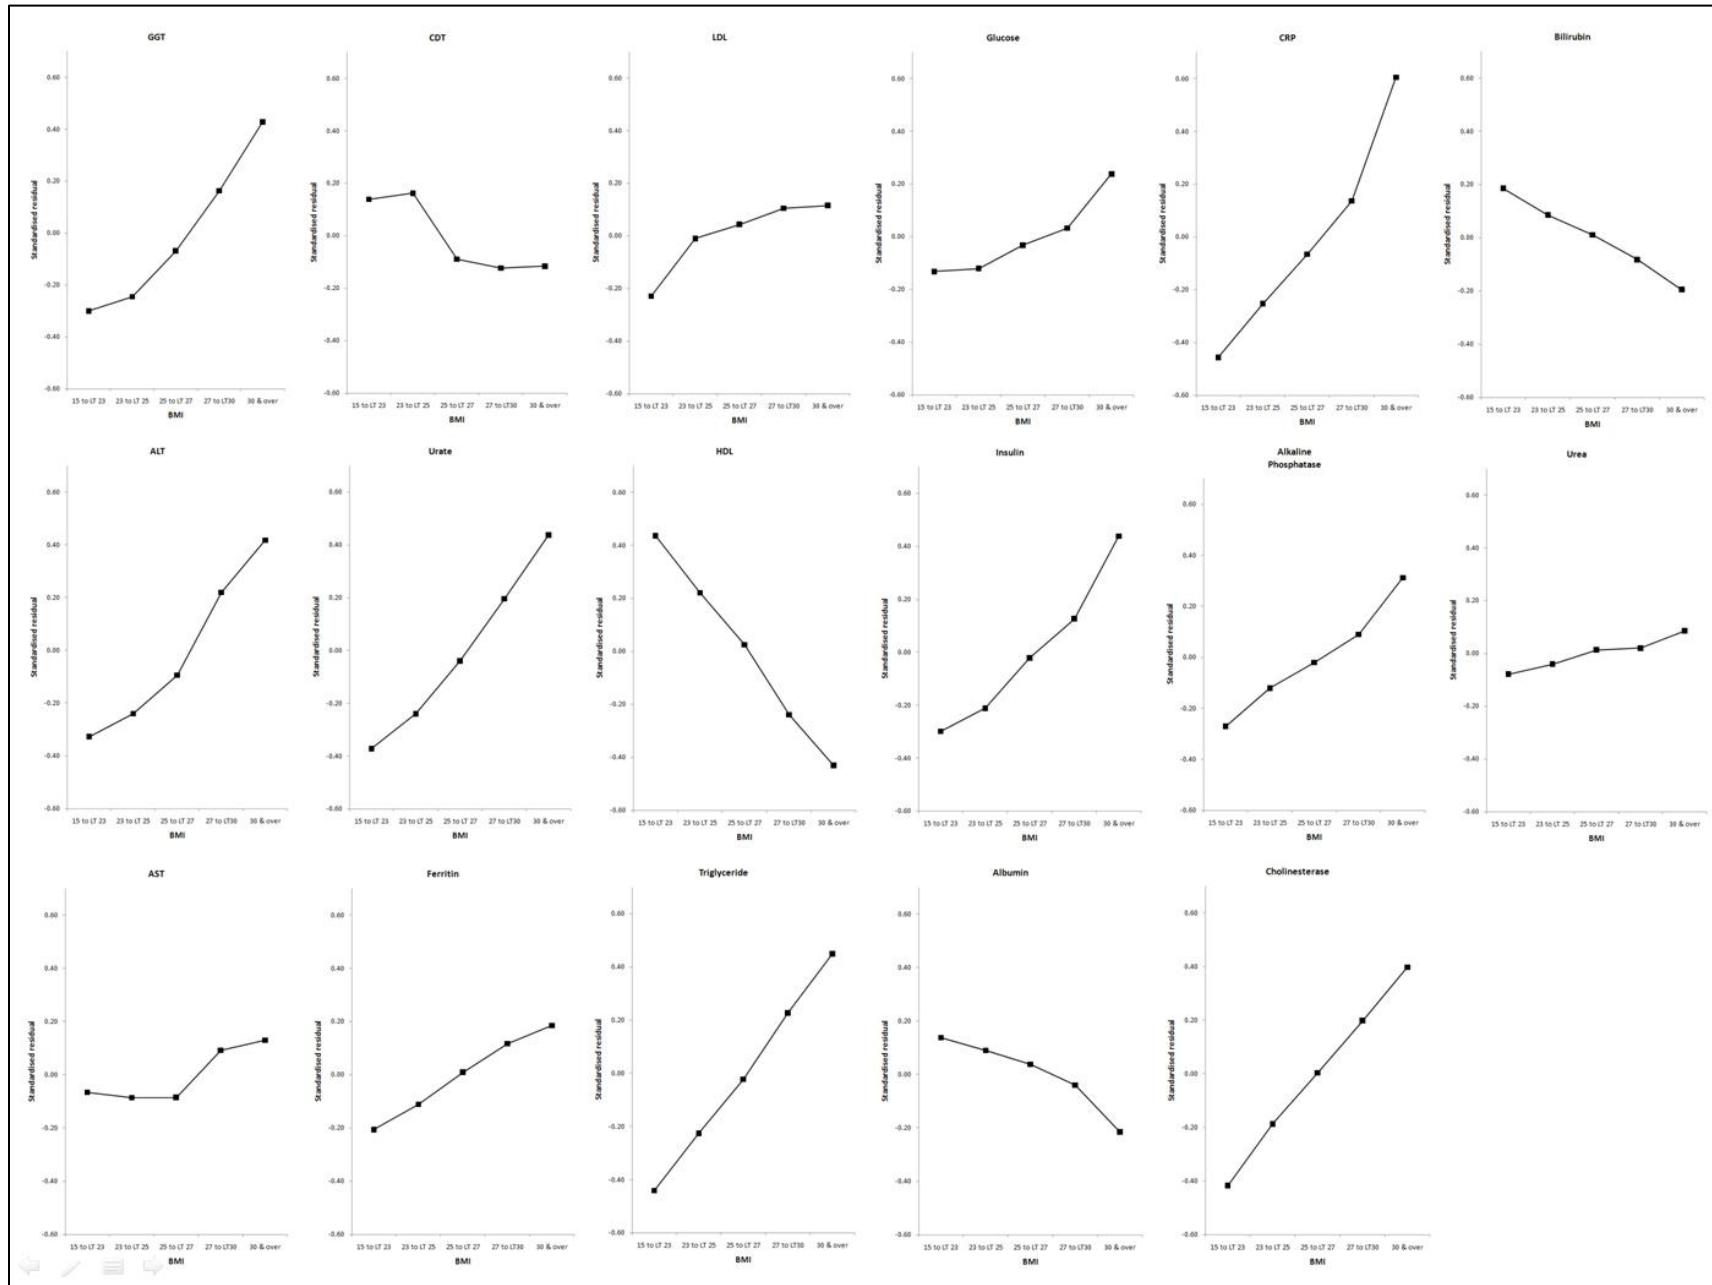

Supplement: NIHMS408331-supplement-Supp_Figure_1-S8.pdf [file NIHMS408331-supplement-Supp_Figure_1-S8.pdf]
